# Supplementary material for: Assessing reliability in neuroimaging research through intra-class effect decomposition (ICED)
Source: eLife journal article supplement (doi:10.7554/elife.35718), 2018-07-02
Supplement: supp [file elife-35718-supp-v1.zip]

Archive with 5 entries (5 files):
- elife_poa_e35718_Figure_5_source_code_1.xml
- elife_poa_e35718_Source_code_1.r
- elife_poa_e35718_Transparent_Reporting_File.pdf
- elife_poa_e35718_Figure_6_source_code_1.xml
- elife_poa_e35718_Figure_4_source_code_1.xml
