# Supplementary material for: Assessing reliability in neuroimaging research through intra-class effect decomposition (ICED)
Source: eLife journal article supplement (doi:10.7554/elife.35718), 2018-07-02
Supplement: supp [file elife-35718-supp-v1.zip › elife_poa_e35718_Figure_4_source_code_1.xml]

<?xml version="1.0" encoding="UTF-8" standalone="no"?>
<model name="Figure4" specificationType="ONYX" specificationVersion="1.0-1007">
<graph backgroundColor="#ffffff" height="567" meanTreatment="ambique" width="786">
<node caption="D1M1" constant="false" fillColor="#ffffff" fillStyle="FILL" height="50" id="0" labelFontSize="10" latent="false" lineColor="#0" normalized="false" strokeWidth="2.0" width="50" x="100" y="250"/>
<node caption="D1M2" constant="false" fillColor="#ffffff" fillStyle="FILL" height="50" id="1" labelFontSize="10" latent="false" lineColor="#0" normalized="false" strokeWidth="2.0" width="50" x="225" y="250"/>
<node caption="D2M1" constant="false" fillColor="#ffffff" fillStyle="FILL" height="50" id="2" labelFontSize="10" latent="false" lineColor="#0" normalized="false" strokeWidth="2.0" width="50" x="325" y="250"/>
<node caption="D2M2" constant="false" fillColor="#ffffff" fillStyle="FILL" height="50" id="3" labelFontSize="10" latent="false" lineColor="#0" normalized="false" strokeWidth="2.0" width="50" x="450" y="250"/>
<node caption="T" constant="false" fillColor="#ffffcc" fillStyle="GRADIENT" height="50" id="4" labelFontSize="10" latent="true" lineColor="#0" normalized="false" strokeWidth="2.0" width="50" x="275" y="100"/>
<node caption="D1" constant="false" fillColor="#ccffcc" fillStyle="GRADIENT" height="50" id="5" labelFontSize="10" latent="true" lineColor="#0" normalized="false" strokeWidth="2.0" width="50" x="150" y="350"/>
<node caption="D2" constant="false" fillColor="#ccffcc" fillStyle="GRADIENT" height="50" id="6" labelFontSize="10" latent="true" lineColor="#0" normalized="false" strokeWidth="2.0" width="50" x="375" y="350"/>
<node caption="S3" constant="false" fillColor="#ccccff" fillStyle="GRADIENT" height="50" id="7" labelFontSize="10" latent="true" lineColor="#0" normalized="false" strokeWidth="2.0" width="50" x="275" y="350"/>
<node caption="S4" constant="false" fillColor="#ccccff" fillStyle="GRADIENT" height="50" id="8" labelFontSize="10" latent="true" lineColor="#0" normalized="false" strokeWidth="2.0" width="50" x="500" y="350"/>
<node caption="S12" constant="false" fillColor="#ccccff" fillStyle="GRADIENT" height="50" id="9" labelFontSize="10" latent="true" lineColor="#0" normalized="false" strokeWidth="2.0" width="50" x="50" y="350"/>
<node caption="E1" constant="false" fillColor="#ffcccc" fillStyle="GRADIENT" height="50" id="10" labelFontSize="10" latent="true" lineColor="#0" normalized="false" strokeWidth="2.0" width="50" x="100" y="450"/>
<node caption="E2" constant="false" fillColor="#ffcccc" fillStyle="GRADIENT" height="50" id="11" labelFontSize="10" latent="true" lineColor="#0" normalized="false" strokeWidth="2.0" width="50" x="225" y="450"/>
<node caption="E3" constant="false" fillColor="#ffcccc" fillStyle="GRADIENT" height="50" id="12" labelFontSize="10" latent="true" lineColor="#0" normalized="false" strokeWidth="2.0" width="50" x="325" y="450"/>
<node caption="E4" constant="false" fillColor="#ffcccc" fillStyle="GRADIENT" height="50" id="13" labelFontSize="10" latent="true" lineColor="#0" normalized="false" strokeWidth="2.0" width="50" x="450" y="450"/>
<node caption="X" constant="false" fillColor="#ffffff" fillStyle="FILL" height="50" id="14" labelFontSize="10" latent="false" lineColor="#0" normalized="false" strokeWidth="2.0" width="50" x="650" y="250"/>
<node caption="T" constant="false" fillColor="#ffffcc" fillStyle="GRADIENT" height="50" id="15" labelFontSize="10" latent="true" lineColor="#0" normalized="false" strokeWidth="2.0" width="50" x="650" y="100"/>
<node caption="E" constant="false" fillColor="#ffcccc" fillStyle="GRADIENT" height="50" id="16" labelFontSize="10" latent="true" lineColor="#0" normalized="false" strokeWidth="2.0" width="50" x="650" y="450"/>
<edge arrowHead="1" automaticControlPoints="true" automaticNaming="false" curvature="50" definitionVariable="false" doubleHeaded="false" fixed="true" labelFontSize="12.0" lineColor="#0" parameterName="PD-&gt;D1M1" relativeLabelPosition="0.5" sourceNodeId="4" strokeWidth="3.0" targetNodeId="0" value="1.0"/>
<edge arrowHead="1" automaticControlPoints="true" automaticNaming="false" curvature="50" definitionVariable="false" doubleHeaded="false" fixed="true" labelFontSize="12.0" lineColor="#0" parameterName="PD-&gt;D1M2" relativeLabelPosition="0.5" sourceNodeId="4" strokeWidth="3.0" targetNodeId="1" value="1.0"/>
<edge arrowHead="1" automaticControlPoints="true" automaticNaming="false" curvature="50" definitionVariable="false" doubleHeaded="false" fixed="true" labelFontSize="12.0" lineColor="#0" parameterName="PD-&gt;D2M1" relativeLabelPosition="0.5" sourceNodeId="4" strokeWidth="3.0" targetNodeId="2" value="1.0"/>
<edge arrowHead="1" automaticControlPoints="true" automaticNaming="false" curvature="50" definitionVariable="false" doubleHeaded="false" fixed="true" labelFontSize="12.0" lineColor="#0" parameterName="PD-&gt;D2M2" relativeLabelPosition="0.5" sourceNodeId="4" strokeWidth="3.0" targetNodeId="3" value="1.0"/>
<edge arrowHead="1" automaticControlPoints="true" automaticNaming="false" curvature="50" definitionVariable="false" doubleHeaded="false" fixed="true" labelFontSize="12.0" lineColor="#0" parameterName="D1-&gt;D1M1" relativeLabelPosition="0.5" sourceNodeId="5" strokeWidth="3.0" targetNodeId="0" value="1.0"/>
<edge arrowHead="1" automaticControlPoints="true" automaticNaming="false" curvature="50" definitionVariable="false" doubleHeaded="false" fixed="true" labelFontSize="12.0" lineColor="#0" parameterName="D1-&gt;D1M2" relativeLabelPosition="0.5" sourceNodeId="5" strokeWidth="3.0" targetNodeId="1" value="1.0"/>
<edge arrowHead="1" automaticControlPoints="true" automaticNaming="false" curvature="50" definitionVariable="false" doubleHeaded="false" fixed="true" labelFontSize="12.0" lineColor="#0" parameterName="D2-&gt;D2M1" relativeLabelPosition="0.5" sourceNodeId="6" strokeWidth="3.0" targetNodeId="2" value="1.0"/>
<edge arrowHead="1" automaticControlPoints="true" automaticNaming="false" curvature="50" definitionVariable="false" doubleHeaded="false" fixed="true" labelFontSize="12.0" lineColor="#0" parameterName="D2-&gt;D2M2" relativeLabelPosition="0.5" sourceNodeId="6" strokeWidth="3.0" targetNodeId="3" value="1.0"/>
<edge arrowHead="1" automaticControlPoints="true" automaticNaming="false" curvature="50" definitionVariable="false" doubleHeaded="false" fixed="true" labelFontSize="12.0" lineColor="#0" parameterName="R3-&gt;D2M1" relativeLabelPosition="0.5" sourceNodeId="7" strokeWidth="3.0" targetNodeId="2" value="1.0"/>
<edge arrowHead="1" automaticControlPoints="true" automaticNaming="false" curvature="50" definitionVariable="false" doubleHeaded="false" fixed="true" labelFontSize="12.0" lineColor="#0" parameterName="R4-&gt;D2M2" relativeLabelPosition="0.5" sourceNodeId="8" strokeWidth="3.0" targetNodeId="3" value="1.0"/>
<edge arrowHead="1" automaticControlPoints="true" automaticNaming="false" curvature="50" definitionVariable="false" doubleHeaded="true" fixed="false" labelFontSize="16.0" lineColor="#0" parameterName="$\sigma^2_T" relativeLabelPosition="0.5" sourceNodeId="4" strokeWidth="3.0" targetNodeId="4" value="13.633408731286956"/>
<edge arrowHead="1" automaticControlPoints="true" automaticNaming="false" curvature="50" definitionVariable="false" doubleHeaded="true" fixed="false" labelFontSize="16.0" lineColor="#0" parameterName="$\sigma^2_S" relativeLabelPosition="0.5" sourceNodeId="8" strokeWidth="3.0" targetNodeId="8" value="0.8629515330906325"/>
<edge arrowHead="1" automaticControlPoints="true" automaticNaming="false" curvature="50" definitionVariable="false" doubleHeaded="true" fixed="false" labelFontSize="16.0" lineColor="#0" parameterName="$\sigma^2_S" relativeLabelPosition="0.5" sourceNodeId="7" strokeWidth="3.0" targetNodeId="7" value="0.8629515330906325"/>
<edge arrowHead="1" automaticControlPoints="true" automaticNaming="false" curvature="50" definitionVariable="false" doubleHeaded="true" fixed="false" labelFontSize="16.0" lineColor="#0" parameterName="$\sigma^2_D" relativeLabelPosition="0.5" sourceNodeId="6" strokeWidth="3.0" targetNodeId="6" value="0.006976520971743521"/>
<edge arrowHead="1" automaticControlPoints="true" automaticNaming="false" curvature="50" definitionVariable="false" doubleHeaded="true" fixed="false" labelFontSize="16.0" lineColor="#0" parameterName="$\sigma^2_D" relativeLabelPosition="0.5" sourceNodeId="5" strokeWidth="3.0" targetNodeId="5" value="0.006976520971743521"/>
<edge arrowHead="1" automaticControlPoints="true" automaticNaming="false" curvature="50" definitionVariable="false" doubleHeaded="true" fixed="false" labelFontSize="16.0" lineColor="#0" parameterName="$\sigma^2_S" relativeLabelPosition="0.5" sourceNodeId="9" strokeWidth="3.0" targetNodeId="9" value="0.8629515330906325"/>
<edge arrowHead="1" automaticControlPoints="true" automaticNaming="false" curvature="50" definitionVariable="false" doubleHeaded="false" fixed="true" labelFontSize="12.0" lineColor="#0" parameterName="R12-&gt;D1M2" relativeLabelPosition="0.5" sourceNodeId="9" strokeWidth="3.0" targetNodeId="1" value="1.0"/>
<edge arrowHead="1" automaticControlPoints="true" automaticNaming="false" curvature="50" definitionVariable="false" doubleHeaded="false" fixed="true" labelFontSize="12.0" lineColor="#0" parameterName="R12-&gt;D1M1" relativeLabelPosition="0.5" sourceNodeId="9" strokeWidth="3.0" targetNodeId="0" value="1.0"/>
<edge arrowHead="1" automaticControlPoints="true" automaticNaming="false" curvature="50" definitionVariable="false" doubleHeaded="true" fixed="false" labelFontSize="16.0" lineColor="#0" parameterName="$\sigma^2_E" relativeLabelPosition="0.5" sourceNodeId="10" strokeWidth="3.0" targetNodeId="10" value="0.04423286939069915"/>
<edge arrowHead="1" automaticControlPoints="true" automaticNaming="false" curvature="50" definitionVariable="false" doubleHeaded="true" fixed="false" labelFontSize="16.0" lineColor="#0" parameterName="$\sigma^2_E" relativeLabelPosition="0.5" sourceNodeId="11" strokeWidth="3.0" targetNodeId="11" value="0.04423286939069915"/>
<edge arrowHead="1" automaticControlPoints="true" automaticNaming="false" curvature="50" definitionVariable="false" doubleHeaded="true" fixed="false" labelFontSize="16.0" lineColor="#0" parameterName="$\sigma^2_E" relativeLabelPosition="0.5" sourceNodeId="12" strokeWidth="3.0" targetNodeId="12" value="0.04423286939069915"/>
<edge arrowHead="1" automaticControlPoints="true" automaticNaming="false" curvature="50" definitionVariable="false" doubleHeaded="true" fixed="false" labelFontSize="16.0" lineColor="#0" parameterName="$\sigma^2_E" relativeLabelPosition="0.5" sourceNodeId="13" strokeWidth="3.0" targetNodeId="13" value="0.04423286939069915"/>
<edge arrowHead="1" automaticControlPoints="true" automaticNaming="false" curvature="50" definitionVariable="false" doubleHeaded="false" fixed="true" labelFontSize="16.0" lineColor="#0" parameterName="E1-&gt;D1M1" relativeLabelPosition="0.5" sourceNodeId="10" strokeWidth="3.0" targetNodeId="0" value="1.0"/>
<edge arrowHead="1" automaticControlPoints="true" automaticNaming="false" curvature="50" definitionVariable="false" doubleHeaded="false" fixed="true" labelFontSize="16.0" lineColor="#0" parameterName="E2-&gt;D1M2" relativeLabelPosition="0.5" sourceNodeId="11" strokeWidth="3.0" targetNodeId="1" value="1.0"/>
<edge arrowHead="1" automaticControlPoints="true" automaticNaming="false" curvature="50" definitionVariable="false" doubleHeaded="false" fixed="true" labelFontSize="16.0" lineColor="#0" parameterName="E3-&gt;D2M1" relativeLabelPosition="0.5" sourceNodeId="12" strokeWidth="3.0" targetNodeId="2" value="1.0"/>
<edge arrowHead="1" automaticControlPoints="true" automaticNaming="false" curvature="50" definitionVariable="false" doubleHeaded="false" fixed="true" labelFontSize="16.0" lineColor="#0" parameterName="E4-&gt;D2M2" relativeLabelPosition="0.5" sourceNodeId="13" strokeWidth="3.0" targetNodeId="3" value="1.0"/>
<edge arrowHead="1" automaticControlPoints="true" automaticNaming="false" curvature="50" definitionVariable="false" doubleHeaded="true" fixed="false" labelFontSize="16.0" lineColor="#0" parameterName="$\sigma^2_T" relativeLabelPosition="0.5" sourceNodeId="15" strokeWidth="3.0" targetNodeId="15" value="13.633408731286956"/>
<edge arrowHead="1" automaticControlPoints="true" automaticNaming="false" curvature="50" definitionVariable="false" doubleHeaded="false" fixed="true" labelFontSize="12.0" lineColor="#0" parameterName="T-&gt;X" relativeLabelPosition="0.5" sourceNodeId="15" strokeWidth="3.0" targetNodeId="14" value="1.0"/>
<edge arrowHead="1" automaticControlPoints="true" automaticNaming="false" curvature="50" definitionVariable="false" doubleHeaded="false" fixed="true" labelFontSize="12.0" lineColor="#0" parameterName="E-&gt;X" relativeLabelPosition="0.5" sourceNodeId="16" strokeWidth="3.0" targetNodeId="14" value="1.0"/>
<edge arrowHead="1" automaticControlPoints="true" automaticNaming="false" curvature="50" definitionVariable="false" doubleHeaded="true" fixed="false" labelFontSize="16.0" lineColor="#0" parameterName="$\sigma^2_{eff}" relativeLabelPosition="0.5" sourceNodeId="16" strokeWidth="3.0" targetNodeId="16" value="0.04423286939069915"/>
</graph>
</model>
