# Supplementary material for: Assessing reliability in neuroimaging research through intra-class effect decomposition (ICED)
Source: eLife journal article supplement (doi:10.7554/elife.35718), 2018-07-02
Supplement: supp [file elife-35718-supp-v1.zip › elife_poa_e35718_Figure_5_source_code_1.xml]

<?xml version="1.0" encoding="UTF-8" standalone="no"?>
<model name="Figure5" specificationType="ONYX" specificationVersion="1.0-1007">
<graph backgroundColor="#ffffff" height="508" meanTreatment="ambique" width="480">
<node caption="T1" constant="false" fillColor="#ffffff" fillStyle="FILL" height="50" id="0" labelFontSize="10" latent="false" lineColor="#0" normalized="false" strokeWidth="2.0" width="50" x="50" y="200"/>
<node caption="T2" constant="false" fillColor="#ffffff" fillStyle="FILL" height="50" id="1" labelFontSize="10" latent="false" lineColor="#0" normalized="false" strokeWidth="2.0" width="50" x="200" y="200"/>
<node caption="T3" constant="false" fillColor="#ffffff" fillStyle="FILL" height="50" id="2" labelFontSize="10" latent="false" lineColor="#0" normalized="false" strokeWidth="2.0" width="50" x="350" y="200"/>
<node caption="T" constant="false" fillColor="#ffffcc" fillStyle="FILL" height="50" id="3" labelFontSize="10" latent="true" lineColor="#0" normalized="false" strokeWidth="2.0" width="50" x="200" y="75"/>
<node caption="R3" constant="false" fillColor="#ccccff" fillStyle="FILL" height="50" id="4" labelFontSize="10" latent="true" lineColor="#0" normalized="false" strokeWidth="2.0" width="50" x="275" y="275"/>
<node caption="R12" constant="false" fillColor="#ccccff" fillStyle="FILL" height="50" id="5" labelFontSize="10" latent="true" lineColor="#0" normalized="false" strokeWidth="2.0" width="50" x="125" y="275"/>
<node caption="E1" constant="false" fillColor="#ffcccc" fillStyle="FILL" height="50" id="6" labelFontSize="10" latent="true" lineColor="#0" normalized="false" strokeWidth="2.0" width="50" x="50" y="375"/>
<node caption="E2" constant="false" fillColor="#ffcccc" fillStyle="FILL" height="50" id="7" labelFontSize="10" latent="true" lineColor="#0" normalized="false" strokeWidth="2.0" width="50" x="200" y="375"/>
<node caption="E3" constant="false" fillColor="#ffcccc" fillStyle="FILL" height="50" id="8" labelFontSize="10" latent="true" lineColor="#0" normalized="false" strokeWidth="2.0" width="50" x="350" y="375"/>
<edge arrowHead="1" automaticControlPoints="true" automaticNaming="false" curvature="50" definitionVariable="false" doubleHeaded="false" fixed="true" labelFontSize="12.0" lineColor="#0" parameterName="PD-&gt;D1M1" relativeLabelPosition="0.5" sourceNodeId="3" strokeWidth="3.0" targetNodeId="0" value="1.0"/>
<edge arrowHead="1" automaticControlPoints="true" automaticNaming="false" curvature="50" definitionVariable="false" doubleHeaded="false" fixed="true" labelFontSize="12.0" lineColor="#0" parameterName="PD-&gt;D1M2" relativeLabelPosition="0.5" sourceNodeId="3" strokeWidth="3.0" targetNodeId="1" value="1.0"/>
<edge arrowHead="1" automaticControlPoints="true" automaticNaming="false" curvature="50" definitionVariable="false" doubleHeaded="false" fixed="true" labelFontSize="12.0" lineColor="#0" parameterName="PD-&gt;D2M1" relativeLabelPosition="0.5" sourceNodeId="3" strokeWidth="3.0" targetNodeId="2" value="1.0"/>
<edge arrowHead="1" automaticControlPoints="true" automaticNaming="false" curvature="50" definitionVariable="false" doubleHeaded="false" fixed="true" labelFontSize="12.0" lineColor="#0" parameterName="R3-&gt;D2M1" relativeLabelPosition="0.5" sourceNodeId="4" strokeWidth="3.0" targetNodeId="2" value="1.0"/>
<edge arrowHead="1" automaticControlPoints="true" automaticNaming="false" curvature="50" definitionVariable="false" doubleHeaded="true" fixed="false" labelFontSize="16.0" lineColor="#0" parameterName="$\sigma^2_T" relativeLabelPosition="0.5" sourceNodeId="3" strokeWidth="3.0" targetNodeId="3" value="0.86"/>
<edge arrowHead="1" automaticControlPoints="true" automaticNaming="false" curvature="50" definitionVariable="false" doubleHeaded="true" fixed="false" labelFontSize="16.0" lineColor="#0" parameterName="$\sigma^2_R" relativeLabelPosition="0.5" sourceNodeId="4" strokeWidth="3.0" targetNodeId="4" value="0.08"/>
<edge arrowHead="1" automaticControlPoints="true" automaticNaming="false" curvature="50" definitionVariable="false" doubleHeaded="true" fixed="false" labelFontSize="16.0" lineColor="#0" parameterName="$\sigma^2_R" relativeLabelPosition="0.5" sourceNodeId="5" strokeWidth="3.0" targetNodeId="5" value="0.08"/>
<edge arrowHead="1" automaticControlPoints="true" automaticNaming="false" curvature="50" definitionVariable="false" doubleHeaded="false" fixed="true" labelFontSize="24.0" lineColor="#0" parameterName="R12-&gt;D1M2" relativeLabelPosition="0.5" sourceNodeId="5" strokeWidth="3.0" targetNodeId="1" value="1.0"/>
<edge arrowHead="1" automaticControlPoints="true" automaticNaming="false" curvature="50" definitionVariable="false" doubleHeaded="false" fixed="true" labelFontSize="12.0" lineColor="#0" parameterName="R12-&gt;D1M1" relativeLabelPosition="0.5" sourceNodeId="5" strokeWidth="3.0" targetNodeId="0" value="1.0"/>
<edge arrowHead="1" automaticControlPoints="true" automaticNaming="false" curvature="50" definitionVariable="false" doubleHeaded="true" fixed="false" labelFontSize="16.0" lineColor="#0" parameterName="$\sigma^2_E" relativeLabelPosition="0.5" sourceNodeId="6" strokeWidth="3.0" targetNodeId="6" value="0.06"/>
<edge arrowHead="1" automaticControlPoints="true" automaticNaming="false" curvature="50" definitionVariable="false" doubleHeaded="true" fixed="false" labelFontSize="16.0" lineColor="#0" parameterName="$\sigma^2_E" relativeLabelPosition="0.5" sourceNodeId="7" strokeWidth="3.0" targetNodeId="7" value="0.06"/>
<edge arrowHead="1" automaticControlPoints="true" automaticNaming="false" curvature="50" definitionVariable="false" doubleHeaded="true" fixed="false" labelFontSize="16.0" lineColor="#0" parameterName="$\sigma^2_E" relativeLabelPosition="0.5" sourceNodeId="8" strokeWidth="3.0" targetNodeId="8" value="0.06"/>
<edge arrowHead="1" automaticControlPoints="true" automaticNaming="false" curvature="50" definitionVariable="false" doubleHeaded="false" fixed="true" labelFontSize="16.0" lineColor="#0" parameterName="E1-&gt;D1M1" relativeLabelPosition="0.5" sourceNodeId="6" strokeWidth="3.0" targetNodeId="0" value="1.0"/>
<edge arrowHead="1" automaticControlPoints="true" automaticNaming="false" curvature="50" definitionVariable="false" doubleHeaded="false" fixed="true" labelFontSize="16.0" lineColor="#0" parameterName="E2-&gt;D1M2" relativeLabelPosition="0.5" sourceNodeId="7" strokeWidth="3.0" targetNodeId="1" value="1.0"/>
<edge arrowHead="1" automaticControlPoints="true" automaticNaming="false" curvature="50" definitionVariable="false" doubleHeaded="false" fixed="true" labelFontSize="16.0" lineColor="#0" parameterName="E3-&gt;D2M1" relativeLabelPosition="0.5" sourceNodeId="8" strokeWidth="3.0" targetNodeId="2" value="1.0"/>
</graph>
</model>
