# Supplementary material for: Assessing reliability in neuroimaging research through intra-class effect decomposition (ICED)
Source: eLife journal article supplement (doi:10.7554/elife.35718), 2018-07-02
Supplement: supp [file elife-35718-supp-v1.zip › elife_poa_e35718_Figure_6_source_code_1.xml]

<?xml version="1.0" encoding="UTF-8" standalone="no"?>
<model name="pannunzi-model" specificationType="ONYX" specificationVersion="1.0-1007">
<graph backgroundColor="#ffffff" height="379" meanTreatment="implicit" width="911">
<node caption="T1" constant="false" fillColor="#ccccff" fillStyle="GRADIENT" height="50" id="0" labelFontSize="10" latent="false" lineColor="#0" normalized="false" strokeWidth="2.0" width="50" x="50" y="225"/>
<node caption="T2" constant="false" fillColor="#ccccff" fillStyle="GRADIENT" height="50" id="1" labelFontSize="10" latent="false" lineColor="#0" normalized="false" strokeWidth="2.0" width="50" x="125" y="200"/>
<node caption="T3" constant="false" fillColor="#ccccff" fillStyle="GRADIENT" height="50" id="2" labelFontSize="10" latent="false" lineColor="#0" normalized="false" strokeWidth="2.0" width="50" x="200" y="225"/>
<node caption="T4" constant="false" fillColor="#ccccff" fillStyle="GRADIENT" height="50" id="3" labelFontSize="10" latent="false" lineColor="#0" normalized="false" strokeWidth="2.0" width="50" x="275" y="200"/>
<node caption="T5" constant="false" fillColor="#ccccff" fillStyle="GRADIENT" height="50" id="4" labelFontSize="10" latent="false" lineColor="#0" normalized="false" strokeWidth="2.0" width="50" x="350" y="225"/>
<node caption="T6" constant="false" fillColor="#ccccff" fillStyle="GRADIENT" height="50" id="5" labelFontSize="10" latent="false" lineColor="#0" normalized="false" strokeWidth="2.0" width="50" x="425" y="200"/>
<node caption="T7" constant="false" fillColor="#ccccff" fillStyle="GRADIENT" height="50" id="6" labelFontSize="10" latent="false" lineColor="#0" normalized="false" strokeWidth="2.0" width="50" x="500" y="225"/>
<node caption="T8" constant="false" fillColor="#ccccff" fillStyle="GRADIENT" height="50" id="7" labelFontSize="10" latent="false" lineColor="#0" normalized="false" strokeWidth="2.0" width="50" x="575" y="200"/>
<node caption="T9" constant="false" fillColor="#ccccff" fillStyle="GRADIENT" height="50" id="8" labelFontSize="10" latent="false" lineColor="#0" normalized="false" strokeWidth="2.0" width="50" x="650" y="225"/>
<node caption="T10" constant="false" fillColor="#ccccff" fillStyle="GRADIENT" height="50" id="9" labelFontSize="10" latent="false" lineColor="#0" normalized="false" strokeWidth="2.0" width="50" x="725" y="200"/>
<node caption="X" constant="false" fillColor="#ffffcc" fillStyle="GRADIENT" height="50" id="10" labelFontSize="10" latent="true" lineColor="#0" normalized="false" strokeWidth="2.0" width="50" x="400" y="75"/>
<node caption="TX" constant="false" fillColor="#ccffcc" fillStyle="GRADIENT" height="50" id="11" labelFontSize="10" latent="false" lineColor="#0" normalized="false" strokeWidth="2.0" width="50" x="800" y="75"/>
<edge arrowHead="0" automaticControlPoints="true" automaticNaming="false" curvature="50" definitionVariable="false" doubleHeaded="true" fixed="false" labelFontSize="12.0" lineColor="#0" parameterName="$\sigma^2_w" relativeLabelPosition="0.5" sourceNodeId="0" strokeWidth="3.0" targetNodeId="0" value="0.66"/>
<edge arrowHead="0" automaticControlPoints="true" automaticNaming="false" curvature="50" definitionVariable="false" doubleHeaded="true" fixed="false" labelFontSize="12.0" lineColor="#0" parameterName="$\sigma^2_w" relativeLabelPosition="0.5" sourceNodeId="1" strokeWidth="3.0" targetNodeId="1" value="0.66"/>
<edge arrowHead="0" automaticControlPoints="true" automaticNaming="false" curvature="50" definitionVariable="false" doubleHeaded="true" fixed="false" labelFontSize="12.0" lineColor="#0" parameterName="$\sigma^2_w" relativeLabelPosition="0.5" sourceNodeId="2" strokeWidth="3.0" targetNodeId="2" value="0.66"/>
<edge arrowHead="0" automaticControlPoints="true" automaticNaming="false" curvature="50" definitionVariable="false" doubleHeaded="true" fixed="false" labelFontSize="12.0" lineColor="#0" parameterName="$\sigma^2_w" relativeLabelPosition="0.5" sourceNodeId="3" strokeWidth="3.0" targetNodeId="3" value="0.66"/>
<edge arrowHead="0" automaticControlPoints="true" automaticNaming="false" curvature="50" definitionVariable="false" doubleHeaded="true" fixed="false" labelFontSize="12.0" lineColor="#0" parameterName="$\sigma^2_w" relativeLabelPosition="0.5" sourceNodeId="4" strokeWidth="3.0" targetNodeId="4" value="0.66"/>
<edge arrowHead="0" automaticControlPoints="true" automaticNaming="false" curvature="50" definitionVariable="false" doubleHeaded="true" fixed="false" labelFontSize="12.0" lineColor="#0" parameterName="$\sigma^2_w" relativeLabelPosition="0.5" sourceNodeId="5" strokeWidth="3.0" targetNodeId="5" value="0.66"/>
<edge arrowHead="0" automaticControlPoints="true" automaticNaming="false" curvature="50" definitionVariable="false" doubleHeaded="true" fixed="false" labelFontSize="12.0" lineColor="#0" parameterName="$\sigma^2_w" relativeLabelPosition="0.5" sourceNodeId="6" strokeWidth="3.0" targetNodeId="6" value="0.66"/>
<edge arrowHead="0" automaticControlPoints="true" automaticNaming="false" curvature="50" definitionVariable="false" doubleHeaded="true" fixed="false" labelFontSize="12.0" lineColor="#0" parameterName="$\sigma^2_w" relativeLabelPosition="0.5" sourceNodeId="7" strokeWidth="3.0" targetNodeId="7" value="0.66"/>
<edge arrowHead="0" automaticControlPoints="true" automaticNaming="false" curvature="50" definitionVariable="false" doubleHeaded="true" fixed="false" labelFontSize="12.0" lineColor="#0" parameterName="$\sigma^2_w" relativeLabelPosition="0.5" sourceNodeId="8" strokeWidth="3.0" targetNodeId="8" value="0.66"/>
<edge arrowHead="0" automaticControlPoints="true" automaticNaming="false" curvature="50" definitionVariable="false" doubleHeaded="true" fixed="false" labelFontSize="12.0" lineColor="#0" parameterName="$\sigma^2_w" relativeLabelPosition="0.5" sourceNodeId="9" strokeWidth="3.0" targetNodeId="9" value="0.66"/>
<edge arrowHead="0" automaticControlPoints="true" automaticNaming="false" curvature="50" definitionVariable="false" doubleHeaded="true" fixed="false" labelFontSize="12.0" lineColor="#0" parameterName="$\sigma^2_b" relativeLabelPosition="0.5" sourceNodeId="10" strokeWidth="3.0" targetNodeId="10" value="0.34"/>
<edge arrowHead="0" automaticControlPoints="true" automaticNaming="false" curvature="50" definitionVariable="false" doubleHeaded="false" fixed="true" labelFontSize="12.0" lineColor="#0" parameterName="$\sigma^2_w" relativeLabelPosition="0.5" sourceNodeId="10" strokeWidth="3.0" targetNodeId="0" value="1.0"/>
<edge arrowHead="0" automaticControlPoints="true" automaticNaming="false" curvature="50" definitionVariable="false" doubleHeaded="false" fixed="true" labelFontSize="12.0" lineColor="#0" parameterName="$\sigma^2_w" relativeLabelPosition="0.5" sourceNodeId="10" strokeWidth="3.0" targetNodeId="1" value="1.0"/>
<edge arrowHead="0" automaticControlPoints="true" automaticNaming="false" curvature="50" definitionVariable="false" doubleHeaded="false" fixed="true" labelFontSize="12.0" lineColor="#0" parameterName="$\sigma^2_w" relativeLabelPosition="0.5" sourceNodeId="10" strokeWidth="3.0" targetNodeId="2" value="1.0"/>
<edge arrowHead="0" automaticControlPoints="true" automaticNaming="false" curvature="50" definitionVariable="false" doubleHeaded="false" fixed="true" labelFontSize="12.0" lineColor="#0" parameterName="$\sigma^2_w" relativeLabelPosition="0.5" sourceNodeId="10" strokeWidth="3.0" targetNodeId="3" value="1.0"/>
<edge arrowHead="0" automaticControlPoints="true" automaticNaming="false" curvature="50" definitionVariable="false" doubleHeaded="false" fixed="true" labelFontSize="12.0" lineColor="#0" parameterName="$\sigma^2_w" relativeLabelPosition="0.5" sourceNodeId="10" strokeWidth="3.0" targetNodeId="4" value="1.0"/>
<edge arrowHead="0" automaticControlPoints="true" automaticNaming="false" curvature="50" definitionVariable="false" doubleHeaded="false" fixed="true" labelFontSize="12.0" lineColor="#0" parameterName="$\sigma^2_w" relativeLabelPosition="0.5" sourceNodeId="10" strokeWidth="3.0" targetNodeId="5" value="1.0"/>
<edge arrowHead="0" automaticControlPoints="true" automaticNaming="false" curvature="50" definitionVariable="false" doubleHeaded="false" fixed="true" labelFontSize="12.0" lineColor="#0" parameterName="$\sigma^2_w" relativeLabelPosition="0.5" sourceNodeId="10" strokeWidth="3.0" targetNodeId="6" value="1.0"/>
<edge arrowHead="0" automaticControlPoints="true" automaticNaming="false" curvature="50" definitionVariable="false" doubleHeaded="false" fixed="true" labelFontSize="12.0" lineColor="#0" parameterName="$\sigma^2_w" relativeLabelPosition="0.5" sourceNodeId="10" strokeWidth="3.0" targetNodeId="7" value="1.0"/>
<edge arrowHead="0" automaticControlPoints="true" automaticNaming="false" curvature="50" definitionVariable="false" doubleHeaded="false" fixed="true" labelFontSize="12.0" lineColor="#0" parameterName="$\sigma^2_w" relativeLabelPosition="0.5" sourceNodeId="10" strokeWidth="3.0" targetNodeId="8" value="1.0"/>
<edge arrowHead="0" automaticControlPoints="true" automaticNaming="false" curvature="50" definitionVariable="false" doubleHeaded="false" fixed="true" labelFontSize="12.0" lineColor="#0" parameterName="$\sigma^2_w" relativeLabelPosition="0.5" sourceNodeId="10" strokeWidth="3.0" targetNodeId="9" value="1.0"/>
<edge arrowHead="0" automaticControlPoints="true" automaticNaming="false" curvature="50" definitionVariable="false" doubleHeaded="true" fixed="false" labelFontSize="12.0" lineColor="#0" parameterName="$\sigma^2_w" relativeLabelPosition="0.1" sourceNodeId="11" strokeWidth="3.0" targetNodeId="11" value="0.66"/>
<edge arrowHead="0" automaticControlPoints="true" automaticNaming="false" curvature="50" definitionVariable="false" doubleHeaded="false" fixed="true" labelFontSize="12.0" lineColor="#0" parameterName="$\sigma^2_w" relativeLabelPosition="0.5" sourceNodeId="10" strokeWidth="3.0" targetNodeId="11" value="1.0"/>
</graph>
</model>
